# Supplementary material
Source: Springer Nature journal article supplement (https://www.springermedizin.de/resource/supplementary/12876_2012_1102_MOESM2_ESM.pdf/9438476)
Supplement: MOESM2 [file 9438476]

|                                                                                                                              |                                                                                                                                   |
|------------------------------------------------------------------------------------------------------------------------------|-----------------------------------------------------------------------------------------------------------------------------------|
| Normal tissue                                                                                                                | UC tissue                                                                                                                         |
| <p><b>a. epithelium</b></p> 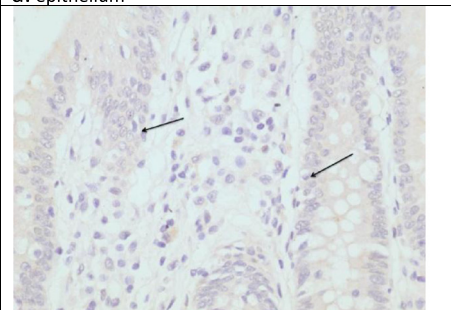                   | <p><b>b. crypt epithelium</b></p>                |
| <p>Negative normal surface epithelium (arrows)</p>                                                                           | <p>Negative epithelium (arrows) and positive neutrophils (arrow heads)</p>                                                        |
| <p><b>c. crypts</b></p>                       |                                                                                                                                   |
| <p>Negative nuclei and cytoplasm and sparse positive nuclei in the lamina propria of normal colonic mucosa (arrow heads)</p> |                                                                                                                                   |
| <p><b>d. lamina propria</b></p>              | <p><b>e. purulent material from ulcer</b></p>  |
| <p>Scattered positive nuclei of mononuclear cells in the lamina propria of normal mucosa (arrow heads)</p>                   | <p>Negative neutrophils in purulent material (arrow heads) positive nuclei of mononuclear cells (arrows)</p>                      |
